# Supplementary material for: SCFβ-TRCP E3 ubiquitin ligase targets the tumor suppressor ZNRF3 for ubiquitination and degradation
Source: PubMed Central journal article supplement (PMC6160385; doi:10.1007/s13238-018-0510-2), 2018-03-01
Supplement: 13238_2018_510_MOESM1_ESM.pdf [file 13238_2018_510_MOESM1_ESM.pdf]

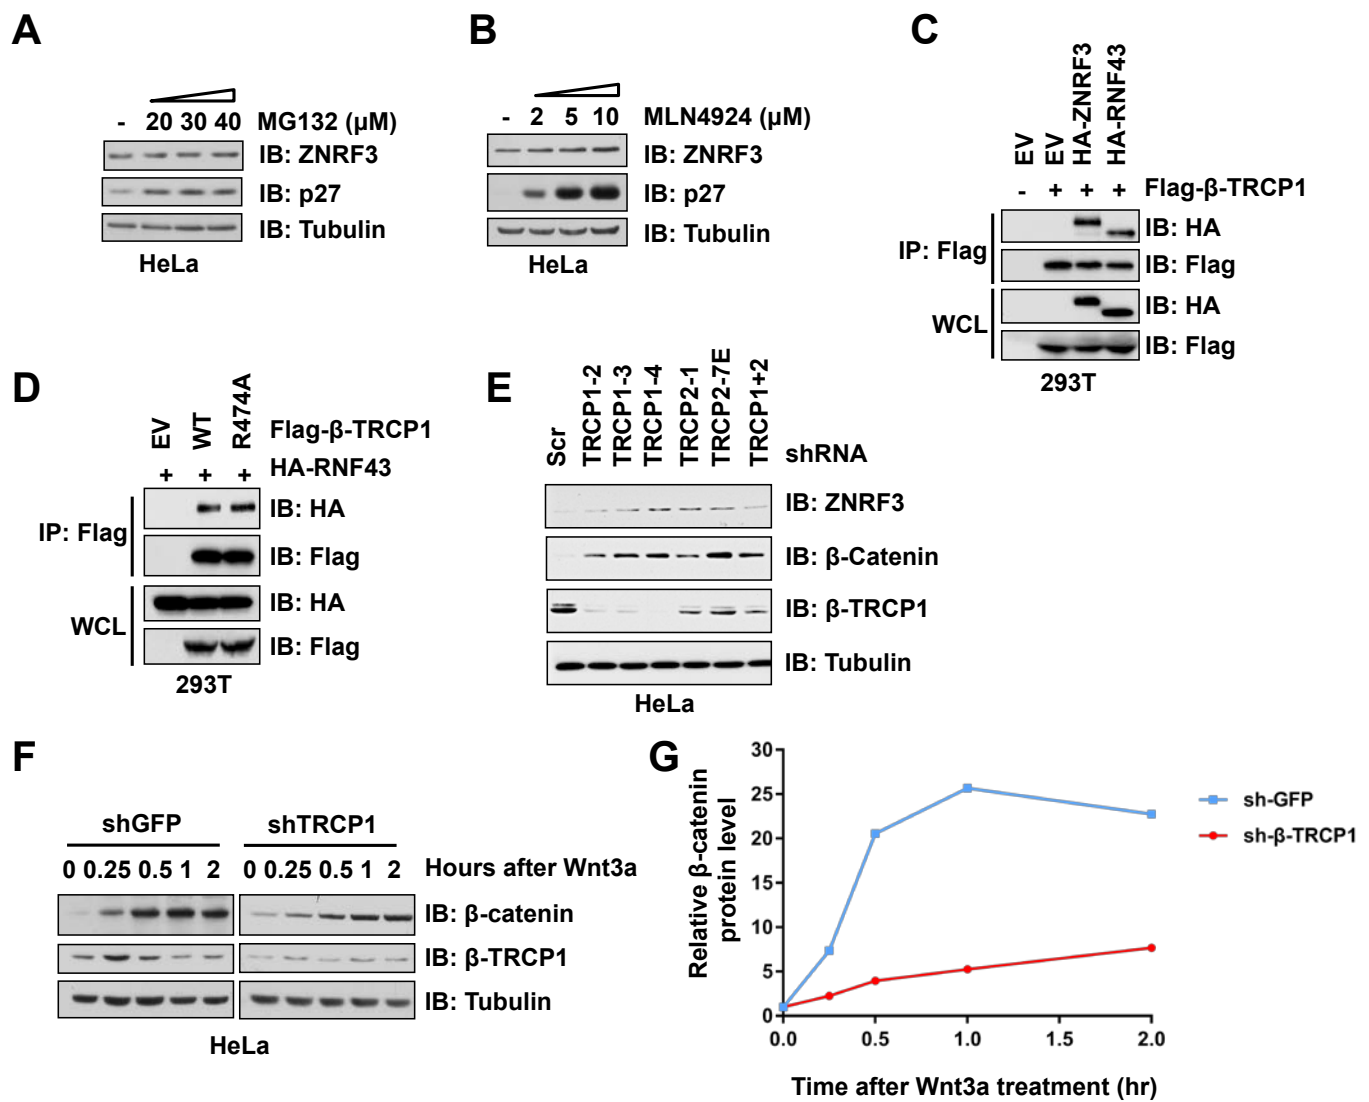

**Figure S1. ZNRF3/RNF43 interacts with TRCP1**

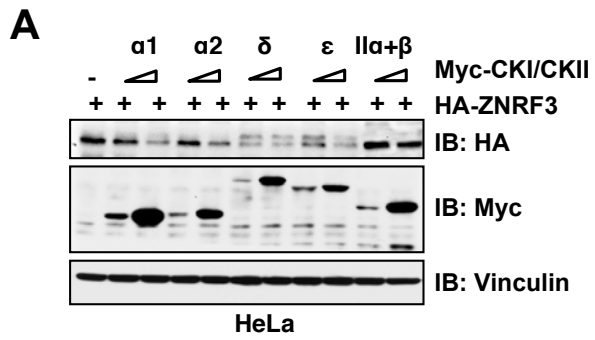

**Figure S2. CKI, but not CKII, promotes the degradation of ZNRI**

**A**

Canonical degron motif  
recognized by  $\beta$ -TRCP:

DpSG (X2-5) pS  
EpSG (X2-5) pS  
pSpSG (X2-5) pS

RNF43

|            |     |                                                    |     |
|------------|-----|----------------------------------------------------|-----|
| Human      | 244 | ATRRYQASCRQARGEWPDSGSSCSSAPVCAICLEEFSEGOELRVISCLHE | 293 |
| Chimpanzee | 244 | ATRRYQASCRQARGEWPDSGSSCSSAPVCAICLEEFSEGOELRVISCLHE | 293 |
| Monkey     | 244 | ATRRYQASCRQAQGEWPDGSSCSSAPVCAICLEEFSEGOELRVISCLHE  | 293 |
| Cattle     | 244 | ATRSYRAGCRGARKEWPDGSSCSSAPVCAICLEEFSEGOELRVISCLHE  | 293 |
| Wolf       | 244 | ATRRYRASCRRARAEPDSSSSCNAPVCAICLEEFSEGOELRIISCLHE   | 293 |
| Rat        | 244 | ATRRYQASCRRRARAEPDSSSSCNAPVCAICLEEFSEGOELRVISCLHE  | 293 |
| Mouse      | 244 | ATRRYQAGCRRARAEPDSSSSCNAPVCAICLEEFSEGOELRVISCLHE   | 293 |
| Chicken    | 246 | ATRRYQARCRQA--SWWDSASSCSSAPVCAICLEEFSEGOELRIISCSHE | 293 |

**B**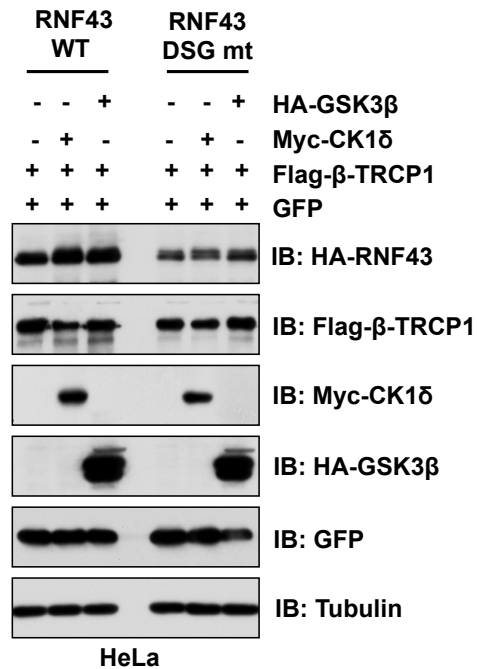

**Figure S3.  $\beta$ -TRCP does not promote the degradation of RNF43**

**A**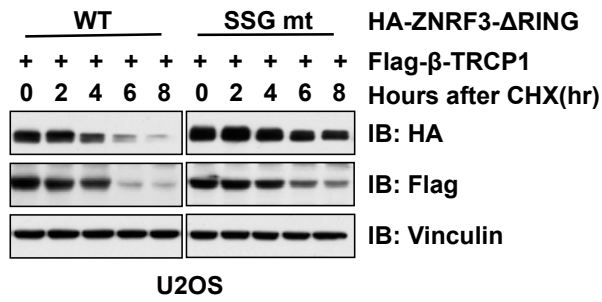**B**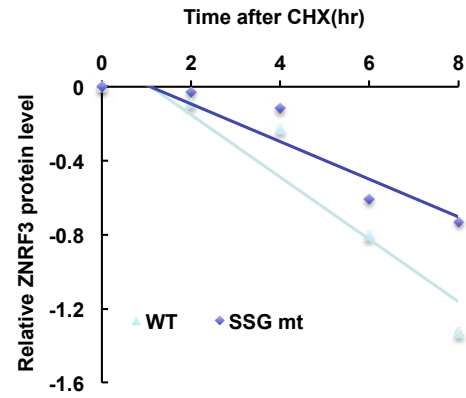**C**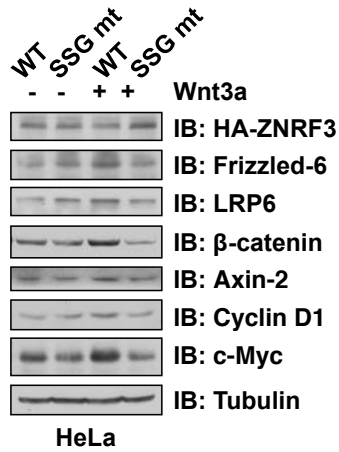

**Figure S4. β-TRCP promotes the degradation of ZNRF3 in a degron dependent manner**

## SUPPLEMENTARY MATERIALS

### Figure S1. ZNRF3/RNF43 interacts with TRCP1

- (A-B) IB analysis of WCL derived from HeLa cells treated with MG132 or MLN4924 different doses for 12 h before harvesting.
- (C-D) IB analysis of IP and WCL derived from HEK293T cells transfected with indicated constructs and were treated with MG132 for 12 h before harvesting.
- (E) IB analysis of WCL derived from HeLa cells infected with lentivirus encoding control (sh-Scr) or multiple independent shRNAs against *TRCP* (sh-TRCP). Infected cells were selected with 1  $\mu$ g/mL puromycin for 72 hr to eliminate non-infected cells before harvesting.
- (F-G) HeLa cells were lentivirally infected with shRNA against  $\beta$ -*TRCP1* and selected with puromycin (1  $\mu$ g/mL) for 5 days, and the resulting cells were stimulated with wnt3a proteins for different time point and subjected to IB analysis (F). The relative  $\beta$ -catenin protein levels were quantified with tubulin and normalized with time=0 in G.

### Figure S2. CKI, but not CKII, promotes the degradation of ZNRF3

- (A) IB analysis of IP and WCL derived from HeLa cells transfected with indicated constructs.

### Figure S3. $\beta$ -TRCP does not promote the degradation of RNF43

- (A) A schematic illustration of the domain structures and putative  $\beta$ -TRCP-degron motifs in RNF43, as well as the sequence alignment with RNF43 from various species to illustrate the evolutionary conservation of this domain. Where indicated, the canonical  $\beta$ -TRCP-degron motifs are shown.
- (B) IB analysis of IP and WCL derived from HeLa cells transfected with indicated constructs.

### Figure S4. $\beta$ -TRCP promotes the degradation of ZNRF3 in a degron dependent manner

- (A-B) IB analysis of WCL derived from U2OS cells transfected with indicated constructs and treated with CHX (100  $\mu$ M) for indicated time points (A), the relative proteins levels were quantified and plotted in (B).
- (C) HeLa cells lentivirally infected with shRNA against ZNRF3 were infected with ZNRF3-WT or SSG-mut ZNRF3 retrovirus, and selected with hygromycin (200  $\mu$ g/mL) for 5 days. The resulting cells were stimulated with or without wnt3a and subjected for IB analysis.
